# Supplementary material for: Identification of novel candidate genes for the inverted teat defect in sows using a genome-wide marker panel
Source: PubMed Central journal article supplement (PMC5391382; doi:10.1007/s13353-016-0382-1), 2017-01-04

## Supplementary files

Figures showing the assembly of own results and published results across all autosomes (chromosome 1-18, SSC1-18) and the X chromosome.

Shown are results for expression studies for inverted teats (green), QTL studies for inverted/ functional teats (red), association studies for inverted/ functional teats (dark red), QTL studies for number of teats (blue) as well as association studies for number of teats (black). If multiple loci were reported from the same study, loci were combined; the number of combined loci is shown in parenthesis behind the reference. It is indicated if results were significant (\*\*,  $P > 0.05$ ), suggestive (\*,  $P > 0.1$ ), or if no information given. Positions are given in approximations and information were taken from the literature and the Pig QTLDB (*Hu Z-L, Park CA, Reecy JM (2016) Developmental progress and current status of the Animal QTLdb Nucleic Acids Research 44:D827-D833 doi:10.1093/nar/gkv1233*). Charts were designed using MapChart (*Voorrips RE (2002) MapChart: Software for the Graphical Presentation of Linkage Maps and QTLs Journal of Heredity 93:77-78 doi:10.1093/jhered/93.1.77*). References used are the following:

- Arakawa A et al. (2015) Genome-wide association QTL mapping for teat number in a purebred population of Duroc pigs *Animal Genetics* 46:571-575 doi:10.1111/age.12331
- Beeckmann P, Moser G, Bartenschlager H, Reiner G, Geldermann H (2003) Linkage and QTL mapping for *Sus scrofa* chromosome 8 *J Anim Breed Genet* 120 doi:10.1046/j.0931-2668.2003.00425.x
- Bidanel JP et al. (2008) Detection of quantitative trait loci for teat number and female reproductive traits in Meishan X Large White F2 pigs *Animal* 2:813-820 doi:10.1017/s1751731108002097
- Cassady JP, Johnson RK, Pomp D, Rohrer GA, Van Vleck LD, Spiegel EK, Gilson KM (2001) Identification of quantitative trait loci affecting reproduction in pigs *Journal of Animal Science* 79:623-633
- Cepica S, Reiner G, Bartenschlager H, Moser G, Geldermann H (2003) Linkage and QTL mapping for *Sus scrofa* chromosome X *J Anim Breed Genet* 120 doi:10.1046/j.0931-2668.2003.00436.x
- Chomwisarutkun K, Murani E, Ponsuksili S, Wimmers K (2012) Gene expression analysis of mammary tissue during fetal bud formation and growth in two pig breeds - indications of prenatal initiation of postnatal phenotypic differences *Bmc Developmental Biology* 12 doi:10.1186/1471-213x-12-13
- Ding N et al. (2009) Genome-wide QTL mapping for three traits related to teat number in a White Duroc x Erhualian pig resource population *BMC Genet* 10 doi:10.1186/1471-2156-10-6
- Dragos-Wendrich M, Moser G, Bartenschlager H, Reiner G, Geldermann H (2003) Linkage and QTL mapping for *Sus scrofa* chromosome 10 *J Anim Breed Genet* 120 doi:10.1046/j.0931-2668.2003.00427.x
- Duijvesteijn N, Veltmaat JM, Knol EF, Harlizius B (2014) High-resolution association mapping of number of teats in pigs reveals regions controlling vertebral development *BMC Genomics* 15:1-12 doi:10.1186/1471-2164-15-542
- Geldermann H et al. (2003) Genome-wide linkage and QTL mapping in porcine F2 families generated from Pietrain, Meishan and Wild Boar crosses *Genomweite Kopplungs- und QTL-Kartierung in porcinen F2-Familien, erzeugt aus Kreuzungen von Pietrain, Meishan und Wildschwein Journal of Animal Breeding and Genetics* 120:363-393 doi:10.1046/j.0931-2668.2003.00408.x
- Guo YM, Lee GJ, Archibald AL, Haley CS (2008) Quantitative trait loci for production traits in pigs: a combined analysis of two Meishan x Large White populations *Anim Genet* 39 doi:10.1111/j.1365-2052.2008.01756.x
- Hernandez SC, Finlayson HA, Ashworth CJ, Haley CS, Archibald AL (2014) A genome-wide linkage analysis for reproductive traits in F(2) Large White x Meishan cross gilts *Animal Genetics* 45:191-197 doi:10.1111/age.12123

- Hirooka H et al. (2001) A whole-genome scan for quantitative trait loci affecting teat number in pigs *J Anim Sci* 79
- Holl JW, Cassady JP, Pomp D, Johnson RK (2004) A genome scan for quantitative trait loci and imprinted regions affecting reproduction in pigs *J Anim Sci* 82
- Jonas E et al. (2008) QTL for the heritable inverted teat defect in pigs *Mammalian Genome* 19:127-138 doi:10.1007/s00335-007-9086-5
- King AH, Jiang Z, Gibson JP, Haley CS, Archibald AL (2003) Mapping quantitative trait loci affecting female reproductive traits on porcine chromosome 8 *Biol Reprod* 68 doi:10.1095/biolreprod.102.012955
- Lee SS et al. (2003) Linkage and QTL mapping for *Sus scrofa* chromosome 2 *J Anim Breed Genet* 120 doi:10.1046/j.0931-2668.2003.00419.x
- Rodriguez C et al. (2005) QTL mapping for teat number in an Iberian x Meishan pig intercross *Anim Genet* 36
- Rohrer GA (2000) Identification of quantitative trait loci affecting birth characters and accumulation of backfat and weight in a Meishan-White Composite resource population *J Anim Sci* 78
- Sato S et al. (2006) Identification of quantitative trait loci affecting corpora lutea and number of teats in a Meishan x Duroc F-2 resource population *Journal of Animal Science* 84:2895-2901 doi:10.2527/jas.2006-176
- Tortereau F, Gilbert H, Heuven HCM, Bidanel J-P, Groenen MAM, Riquet J (2010) Combining two Meishan F2 crosses improves the detection of QTL on pig chromosomes 2, 4 and 6 *Genetics Selection Evolution* 42 doi:10.1186/1297-9686-42-42
- Verardo LL, Silva FF, Varona L, Resende MDV, Bastiaansen JWM, Lopes PS, Guimarães SEF (2014) Bayesian GWAS and network analysis revealed new candidate genes for number of teats in pigs *Journal of Applied Genetics* 56:123-132 doi:10.1007/s13353-014-0240-y
- Wada Y et al. (2000) Quantitative trait loci (QTL) analysis in a Meishan x Göttingen cross population *Animal Genetics* 31:376-384 doi:10.1046/j.1365-2052.2000.00696.x
- Yue G, Schröffel J, Moser G, Bartenschlager H, Reiner G, Geldermann H (2003) Linkage and QTL mapping for *Sus scrofa* chromosome 12 *J Anim Breed Genet* 120 doi:10.1046/j.0931-2668.2003.00429.x
- Zhang J et al. (2007) Detection of quantitative trait loci associated with several internal organ traits and teat number trait in a pig population *J Genet Genomics* 34 doi:10.1016/s1673-8527(07)60032-0

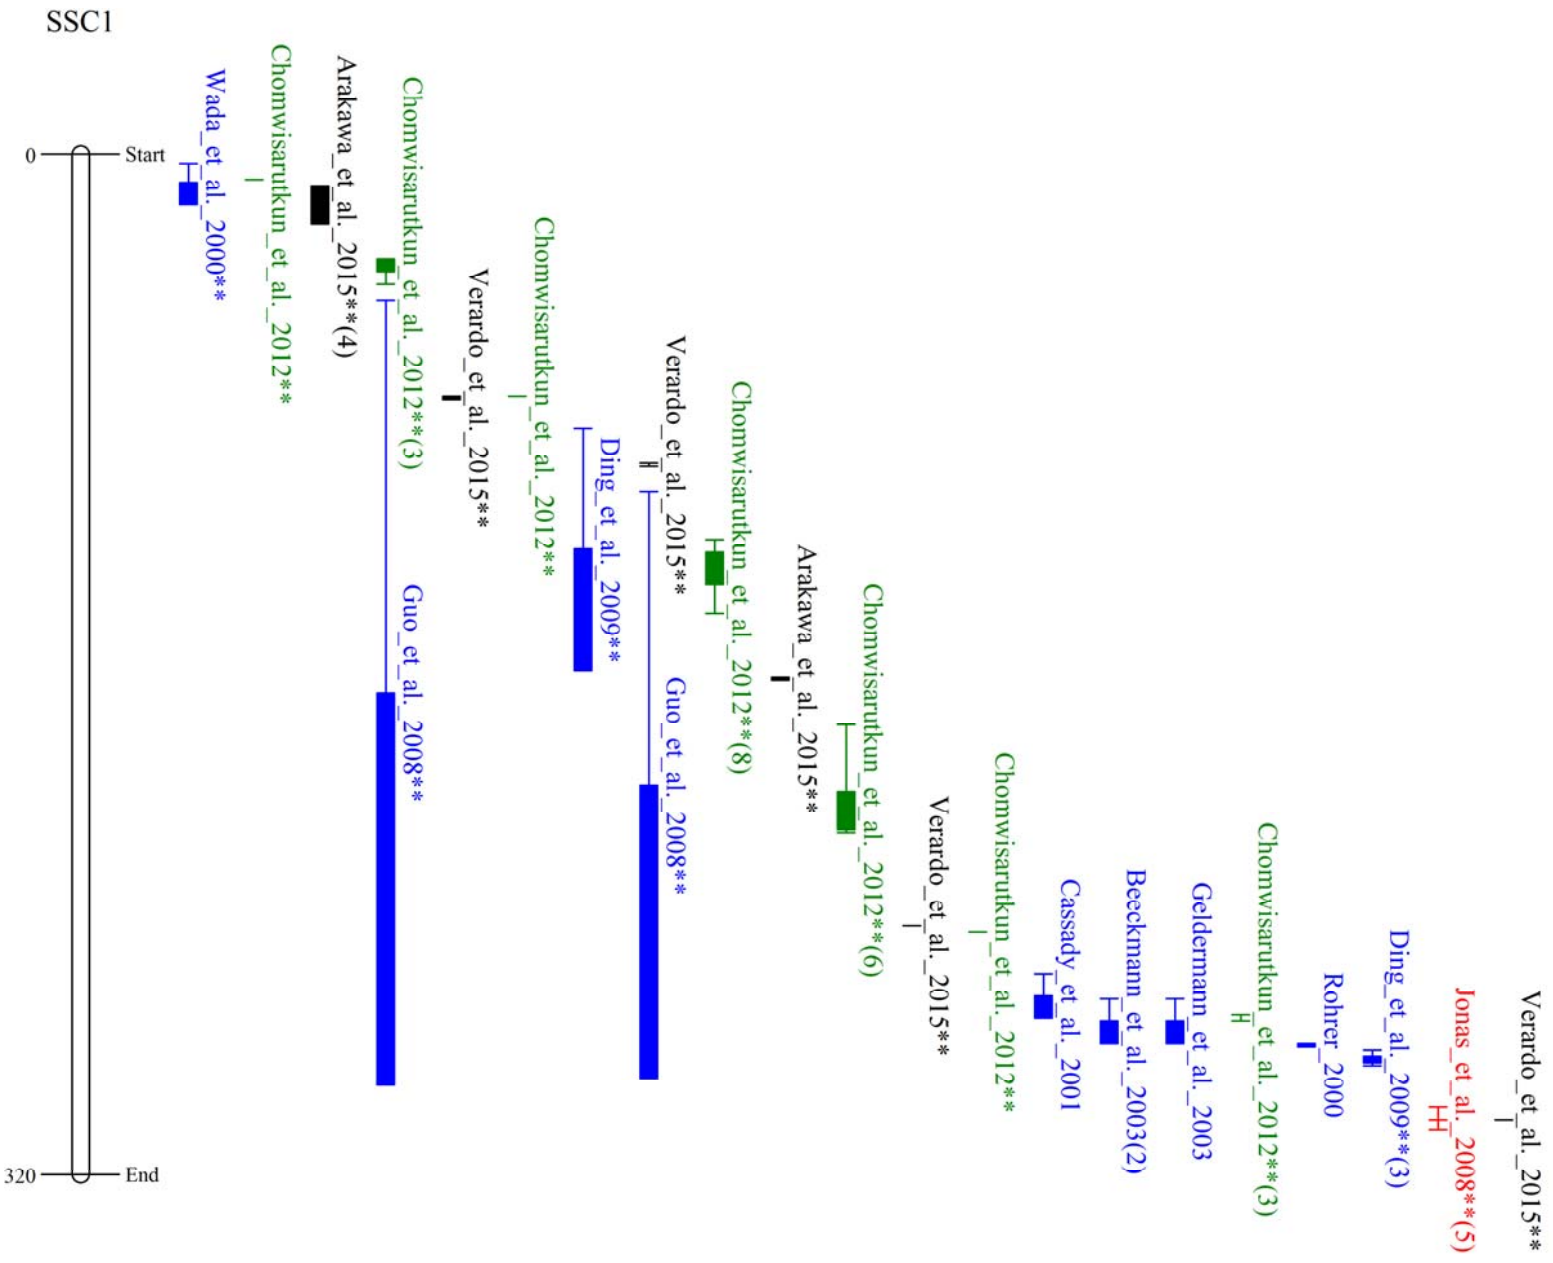

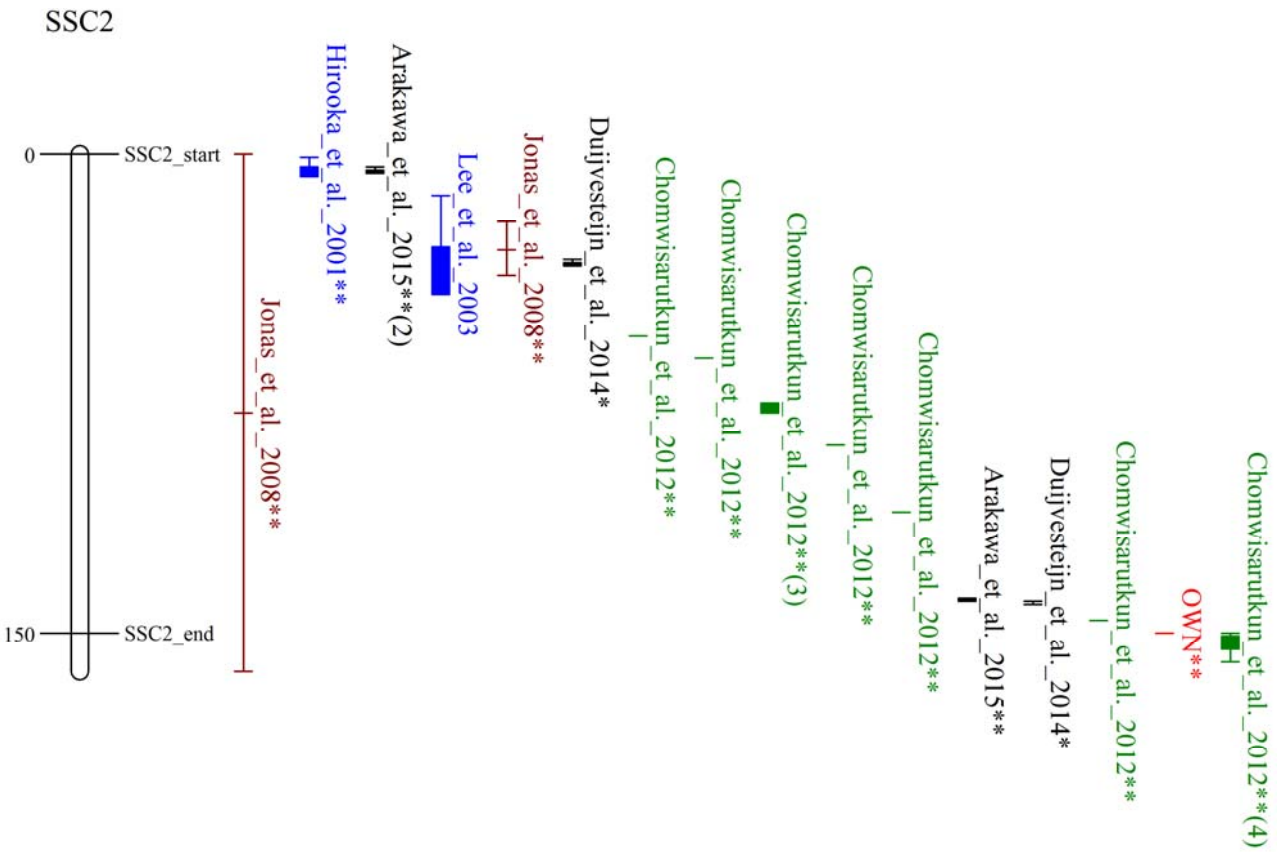

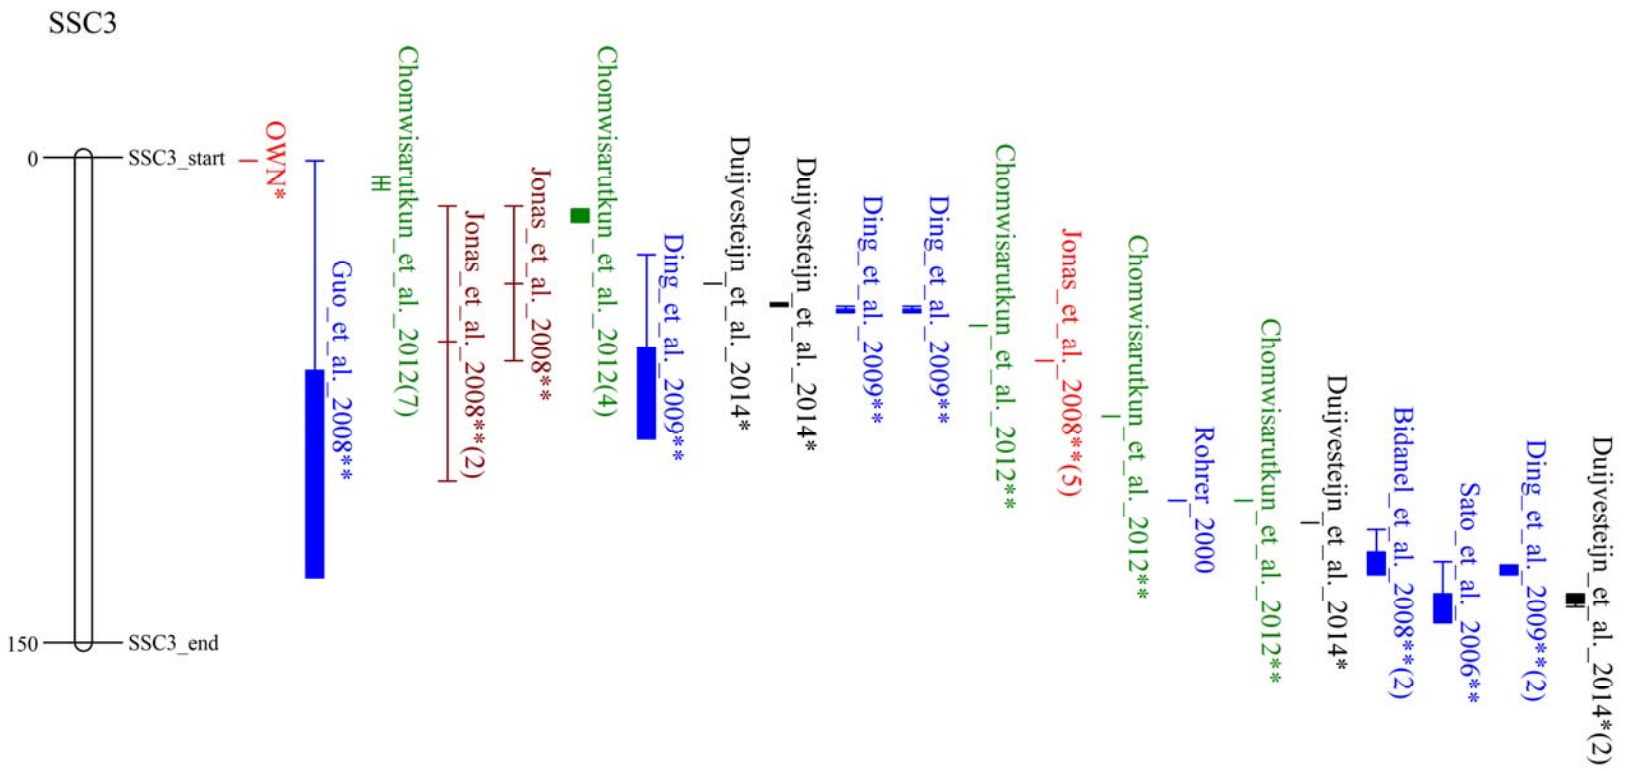

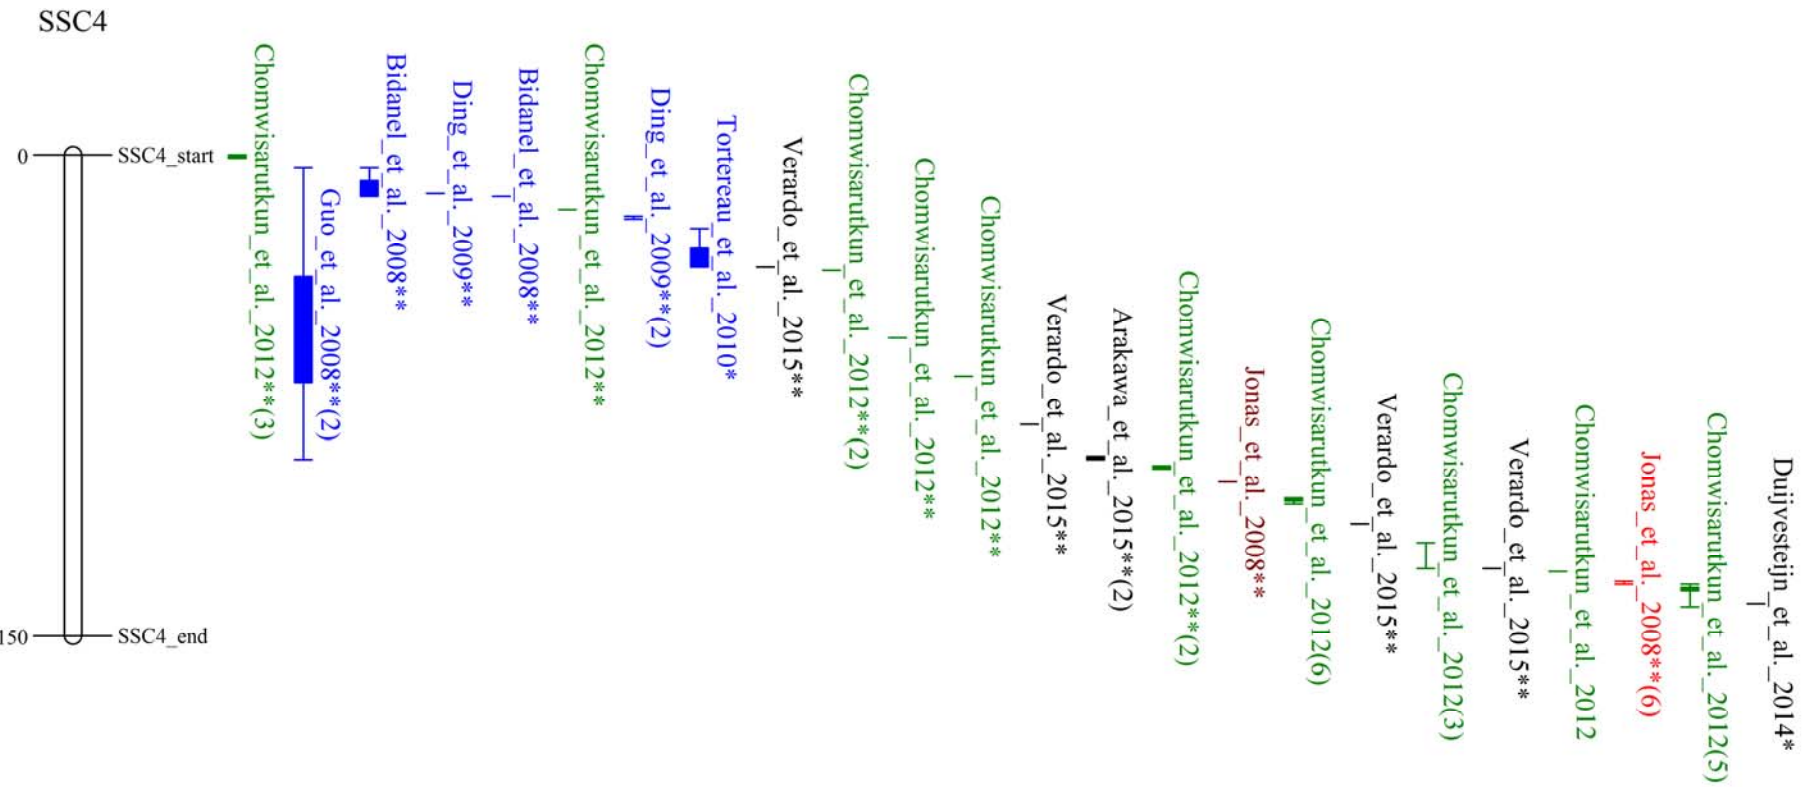

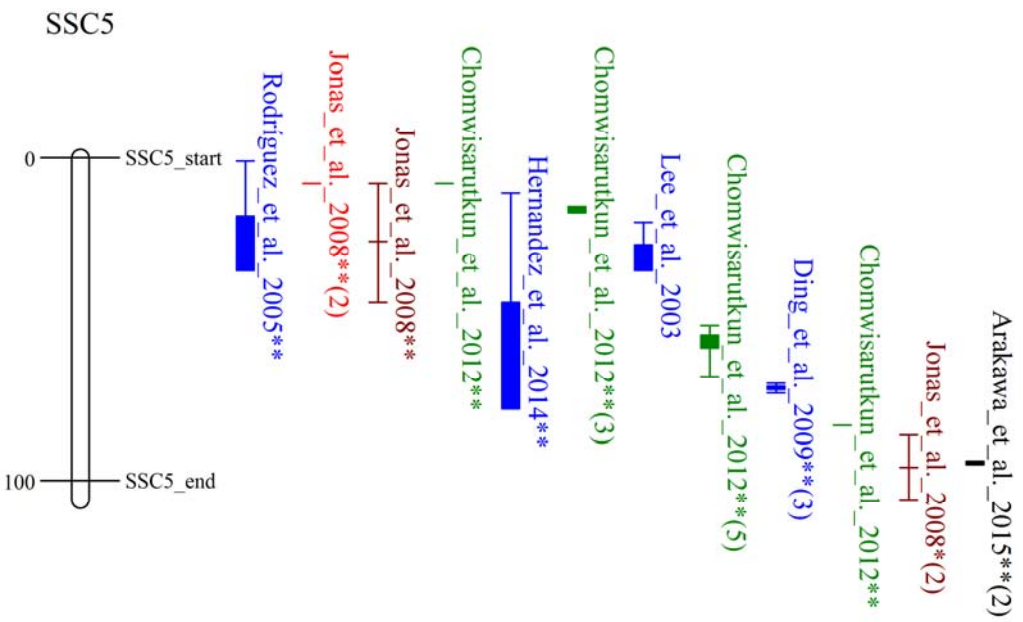

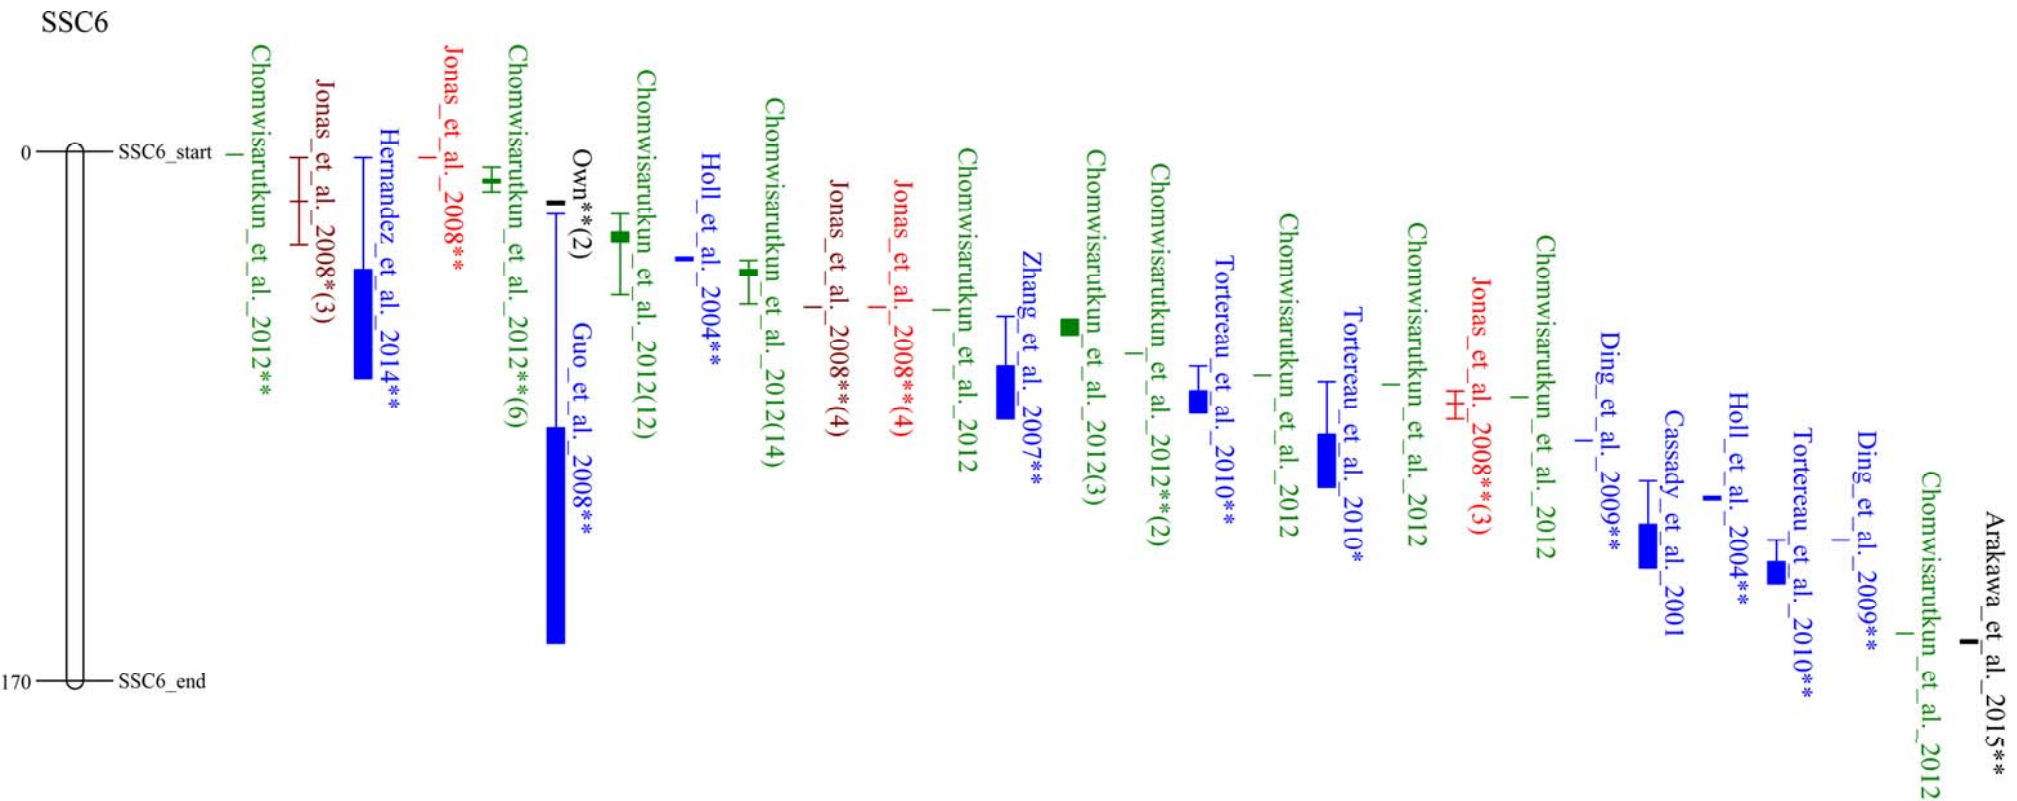



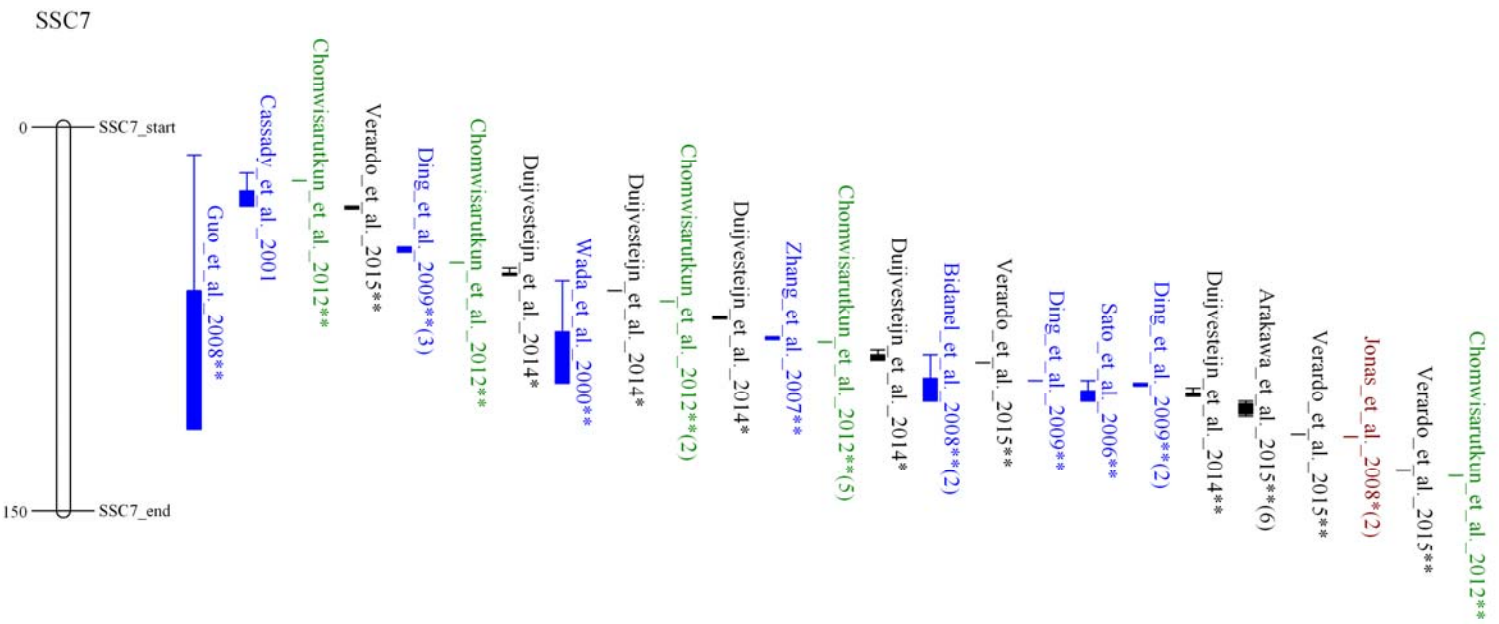

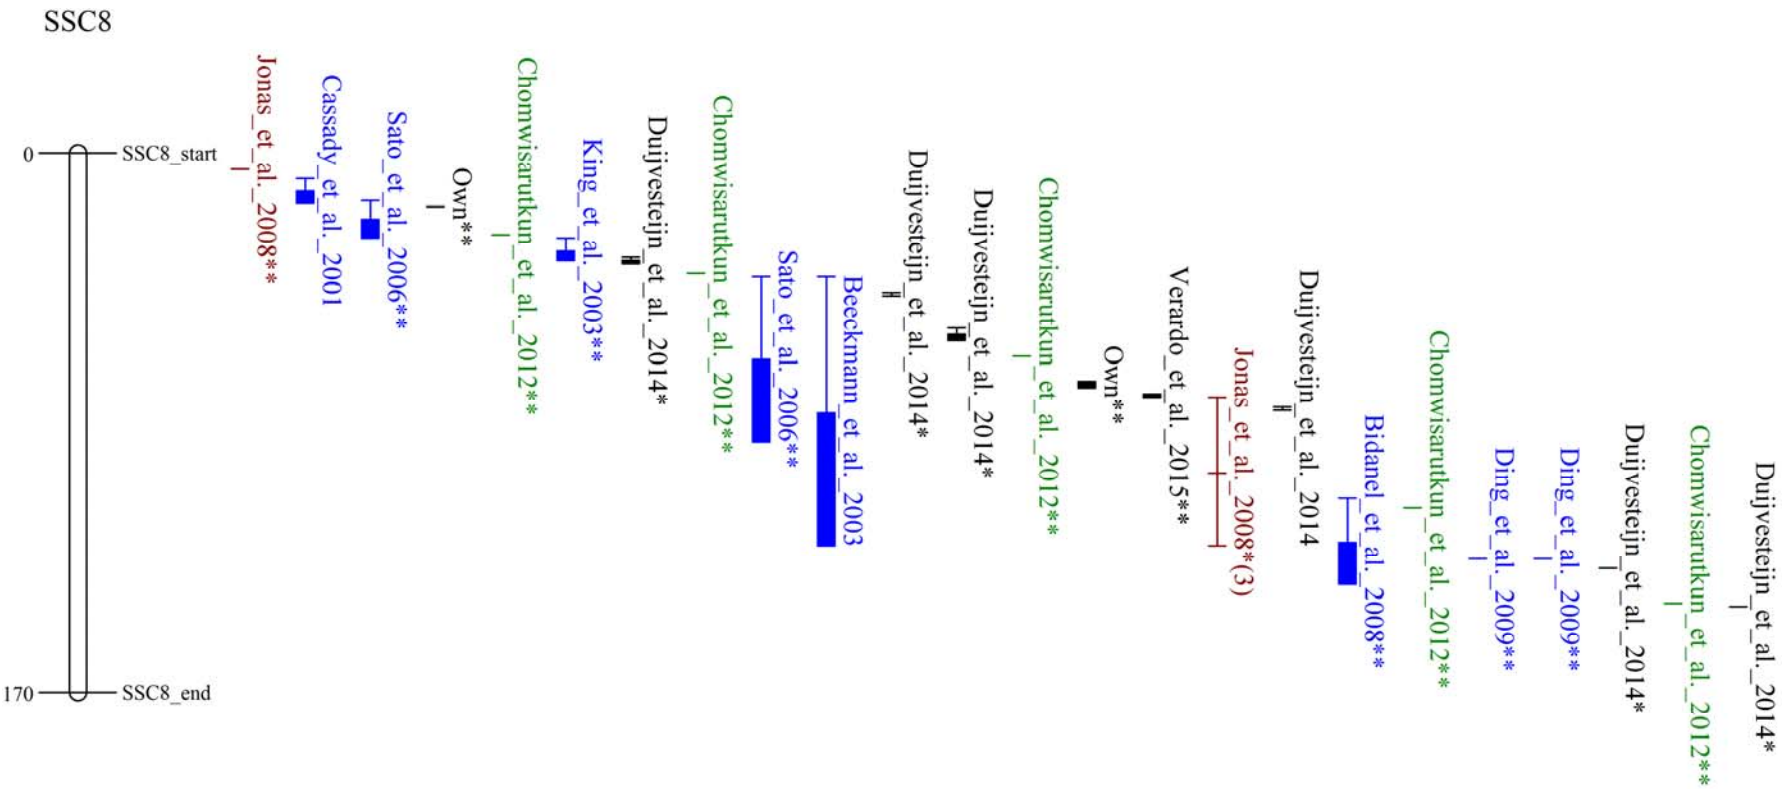

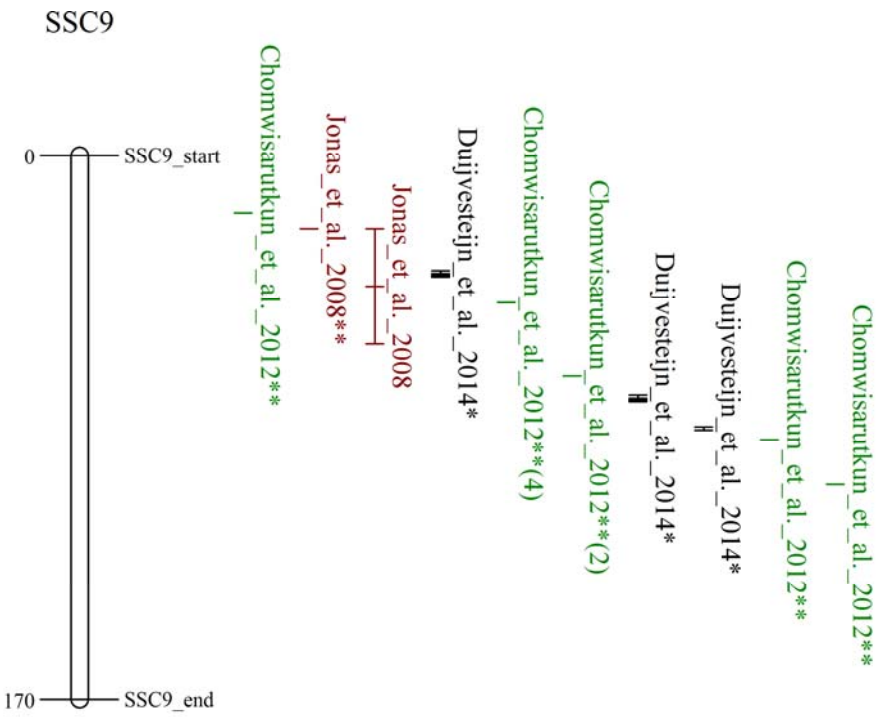

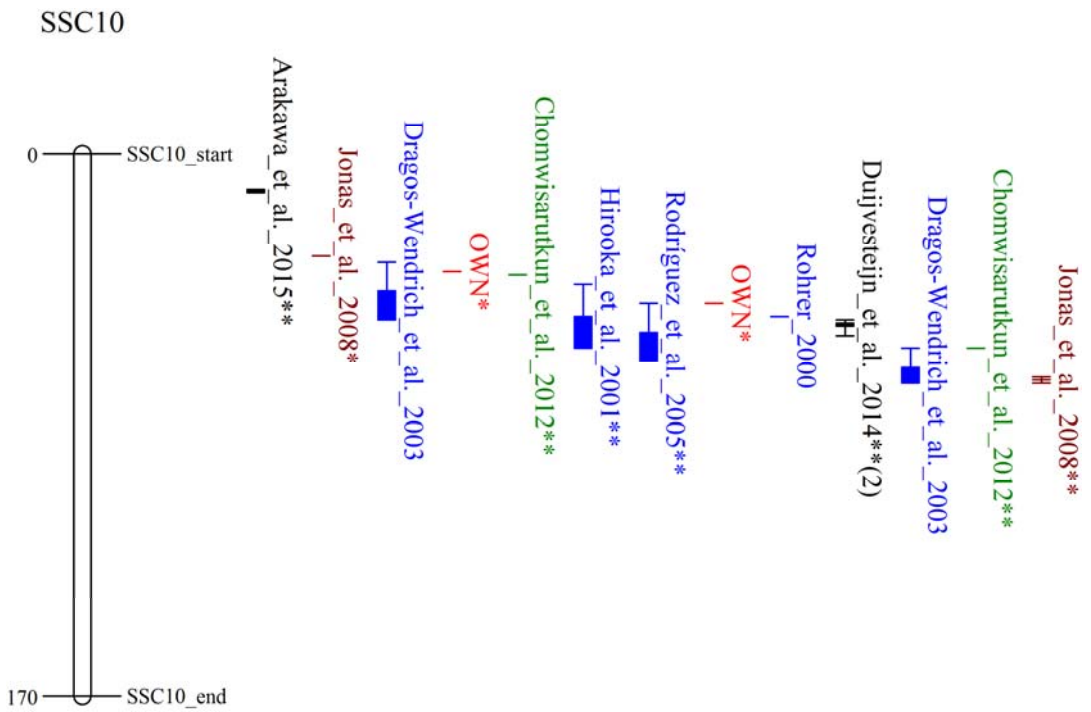

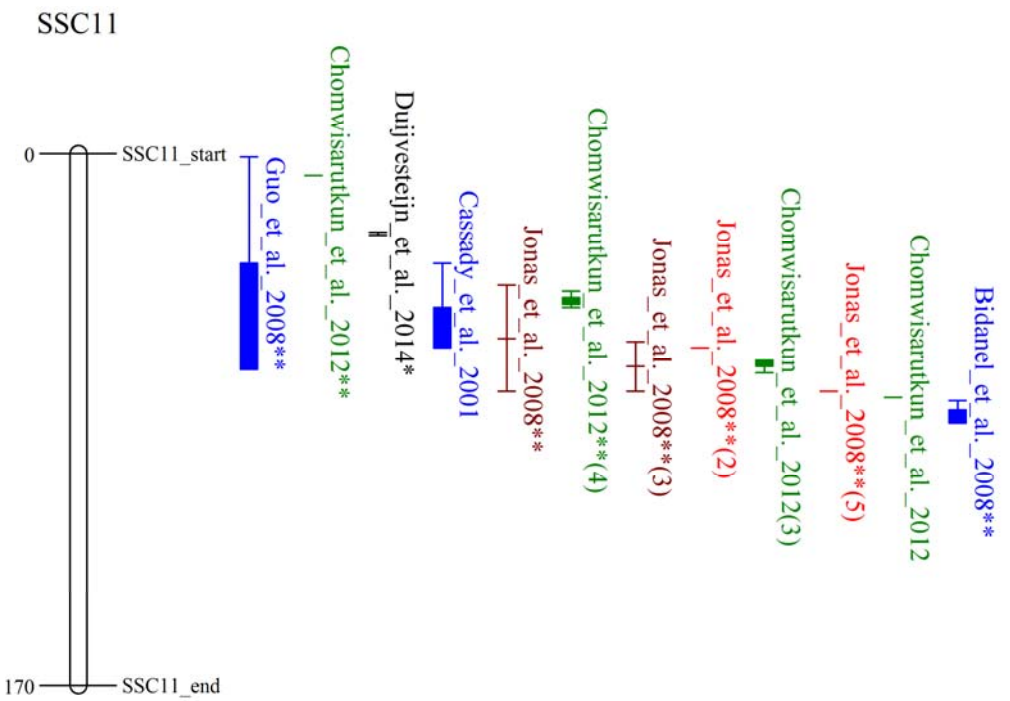

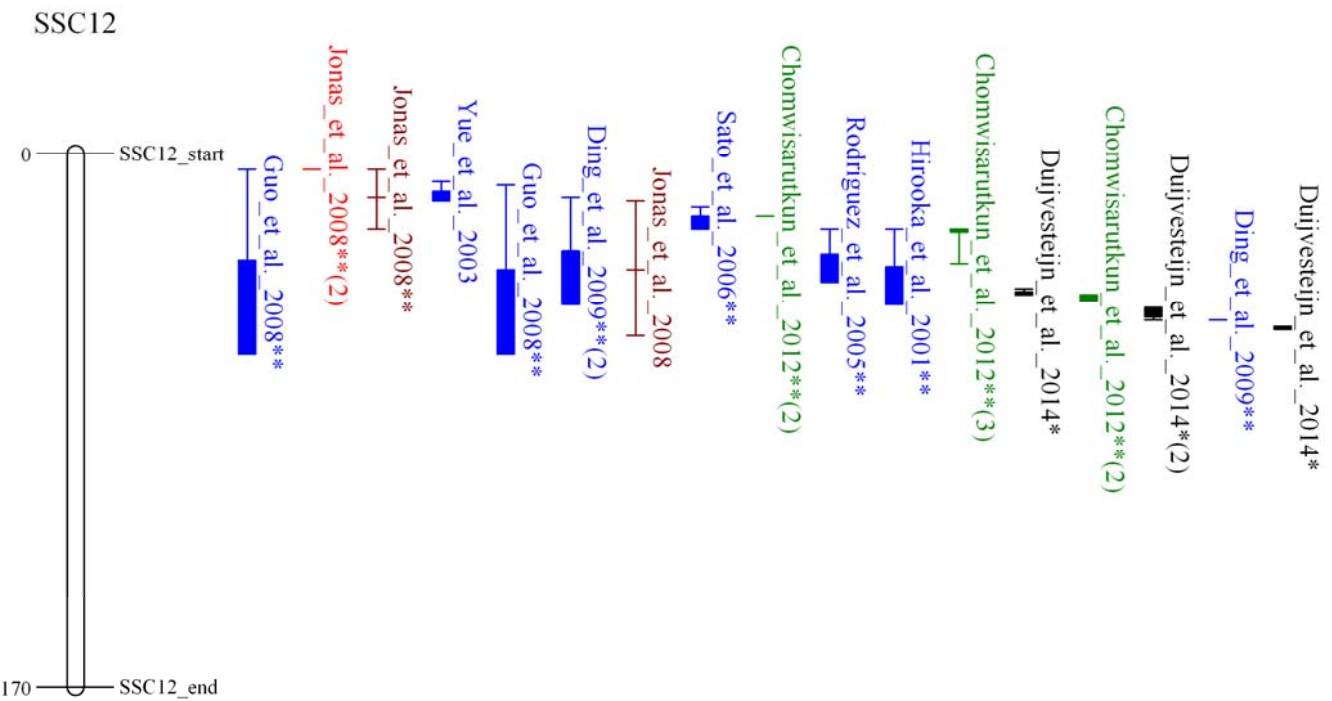

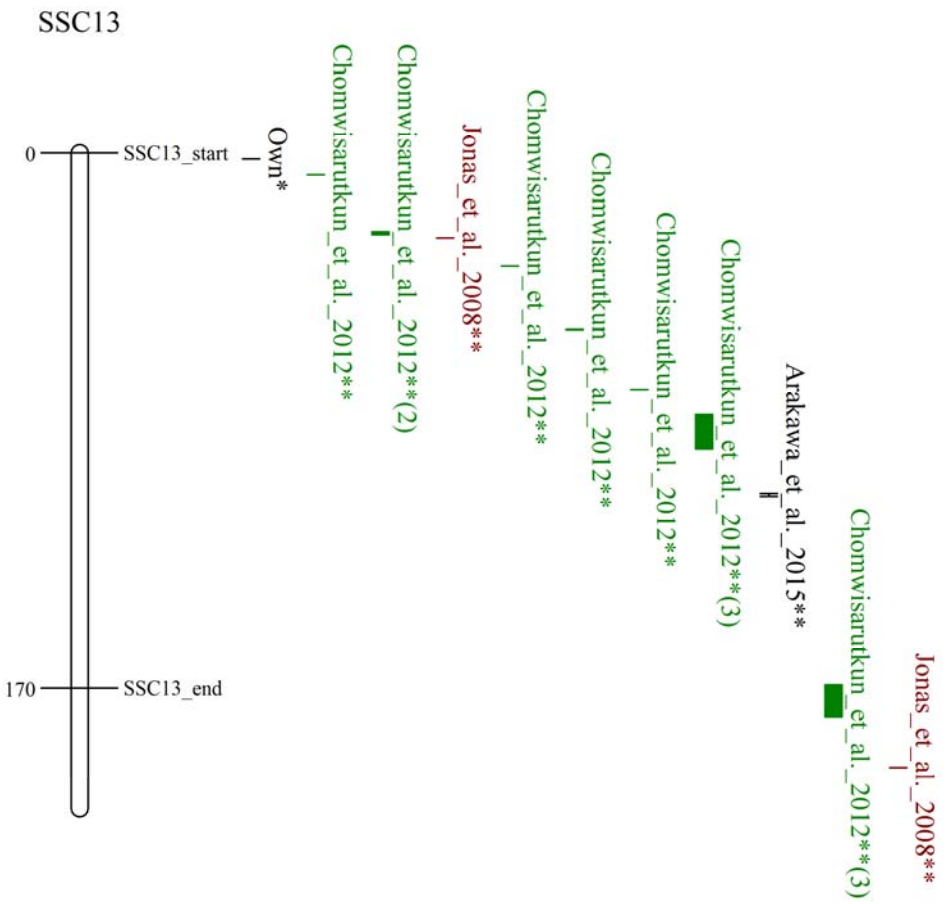

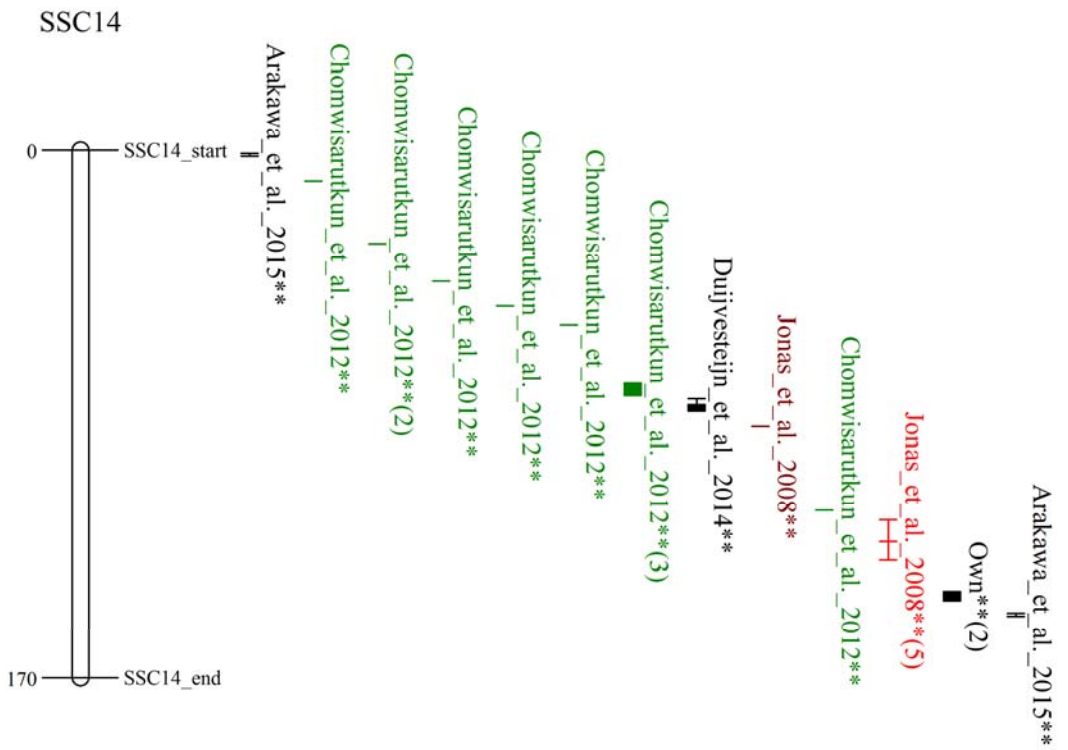



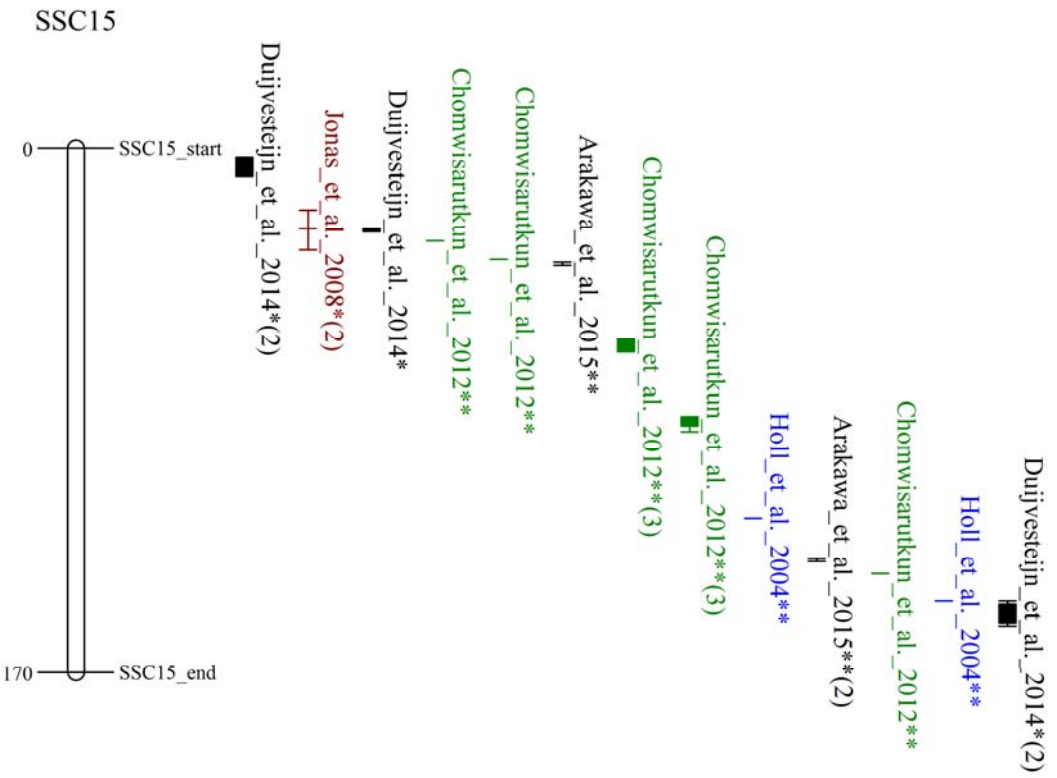

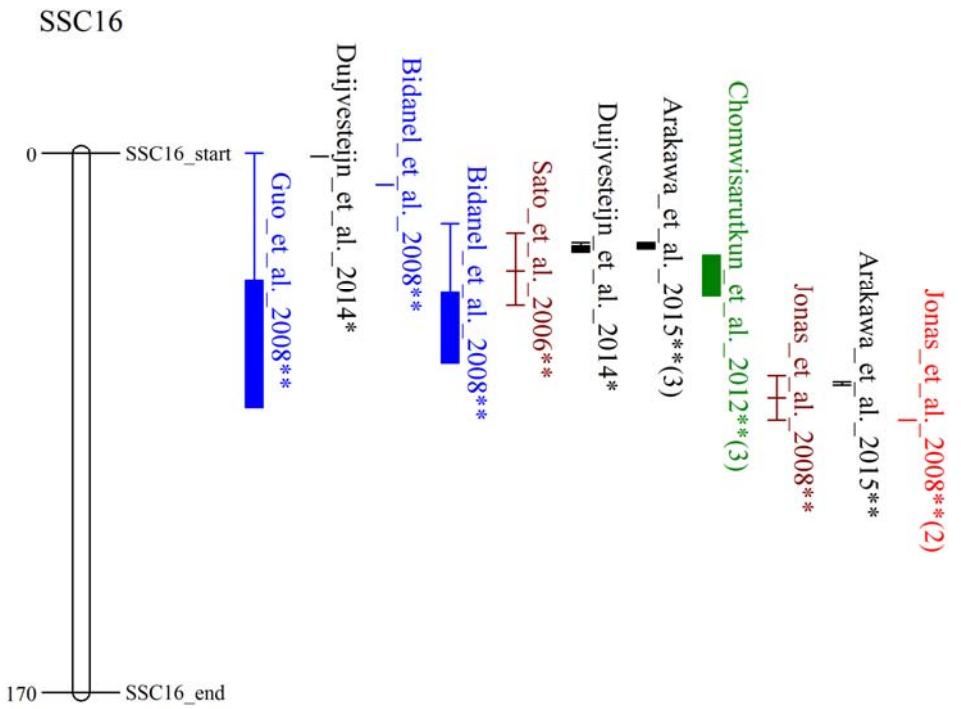

SSC17

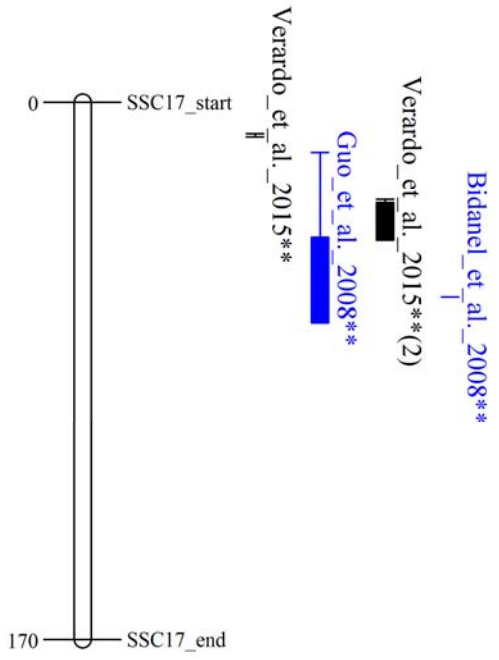

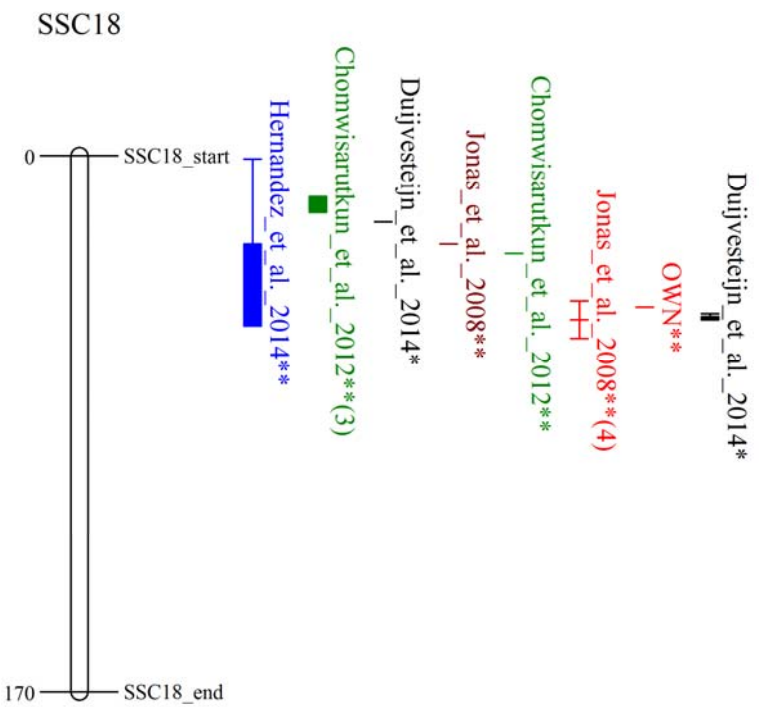

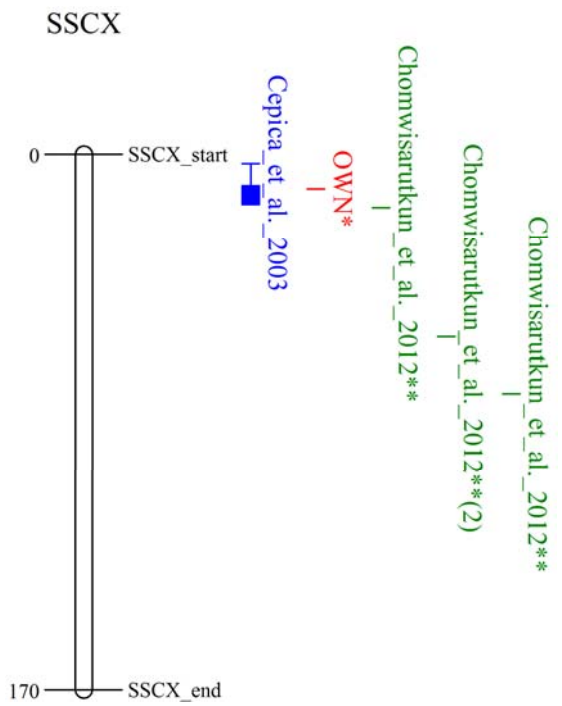

Supplement: 13353_2016_382_MOESM1_ESM.pdf [file 13353_2016_382_MOESM1_ESM.pdf]
